# Supplementary material for: Low knowledge of newborn danger signs among pregnant women in Papua New Guinea and implications for health seeking behaviour in early infancy – findings from a longitudinal study
Source: Springer Nature journal article supplement (doi:10.1186/s12884-022-05322-6), 2023-01-26
Supplement: MOESM1 [file 23958034]

## Supplementary Tables 1-6:

---

### Supplementary TABLE 1:

Knowledge questions related to newborn danger signs from the interview guide  
(available in both English and Tok Pisin)

---

#### **At ANC**

What signs or symptoms in the BABY in the first week after birth do you know that mean you need to go quickly to health care ("Too Sick" Signs)? (choose all mentioned, do not prompt)

#### **At Childbirth**

What signs or symptoms in the BABY in the first week after birth do you know that mean you need to go quickly to health care ("Too Sick" Signs)? (choose all mentioned, do not prompt)

#### **At One-month postnatal**

What signs or symptoms in the OVER THE NEXT FIVE MONTHS do you know that mean you need to go quickly to health care ("Too Sick" Signs)? (Choose all mentioned, do not prompt.)

**All three questions also allowed for 'other comments' by the participants captured as free text.**

## Supplementary TABLE 2:

### Newborn danger signs requiring early intervention

---

The WHO recommended signs or symptoms were provided as a list to enable interviewers to rapidly code the woman's response to the open questions detailed in the supplementary material above. The Johns Hopkins' Birth Preparedness and Complications Readiness Index indicators were used in data analysis

---

|                                                                                             |                                                                                                                                                                                                                                                                                                |
|---------------------------------------------------------------------------------------------|------------------------------------------------------------------------------------------------------------------------------------------------------------------------------------------------------------------------------------------------------------------------------------------------|
| <b>World Health Organisation recommendations on newborn health (2017)</b>                   | (1) stopped feeding well,<br>(2) history of convulsions,<br>(3) fast breathing,<br>(4) severe chest in-drawing,<br>(5) no spontaneous movement,<br>(6) temperature >37.5 °C,<br>(7) temperature <35.5 °C,<br>(8) any jaundice in first 24 hours of life, or yellow palms and soles at any age. |
| <b>Johns Hopkins' Birth Preparedness and Complication Readiness Index (Del Barco, 2004)</b> | (1) Convulsions/spasms/rigidity<br>(2) Difficult/fast breathing<br>(3) Very small baby<br>(4) Lethargy/unconsciousness                                                                                                                                                                         |

**Supplementary TABLE 3:**

Other signs reported by the mothers across the three time points

| Other signs reported by the mother                        | Mothers reporting the other signs n (%) |                       | One month postnatal<br>N = 581 |
|-----------------------------------------------------------|-----------------------------------------|-----------------------|--------------------------------|
|                                                           | Antenatal Care<br>N = 692               | Childbirth<br>N = 625 |                                |
| Excessive crying                                          | 158 (22.6)                              | 161 (25.8)            | 166 (27.7)                     |
| Many skin pustules                                        | 126 (18.0)                              | 110 (17.6)            | 94 (16.2)                      |
| Cough                                                     | 91 (13.0)                               | 129 (20.6)            | 356 (61.3)                     |
| Baby vomiting                                             | 71 (10.3)                               | 74 (11.8)             | 88 (15.1)                      |
| Umbilical redness                                         | 63 (9.0)                                | 48 (7.7)              | 24 (4.1)                       |
| Flu/cold/blocked/runny nose/asthma/sick<br>(URT symptoms) | 57 (8.2)                                | 67 (10.7)             | 28 (4.8)                       |
| Inability to urinate or stool                             | 40 (5.7)                                | 62 (9.9)              | 23 (4.0)                       |
| Diarrhoea/stomach related                                 | 16 (2.3)                                | 36 (5.8)              | 159 (27.4)                     |
| Eye/ear related                                           | 7 (0.01)                                | 8 (1.3)               | 8 (1.4)                        |
| Other (* need to list all)                                | 3 (0.43)                                | 11 (1.8)              | 11 (1.9)                       |
| Malaria                                                   | 3 (0.43)                                | 2 (0.3)               | 2 (0.3)                        |

**Supplementary TABLE 4:**

Number of danger signs reported by the mothers at three time points

| Number of WHO Danger Signs Reported by the mother | Mothers reporting danger signs n (%) |                       |                                |
|---------------------------------------------------|--------------------------------------|-----------------------|--------------------------------|
|                                                   | Antenatal Care<br>N = 692            | Childbirth<br>N = 625 | One month postnatal<br>N = 581 |
| None                                              | 215 (31.1)                           | 112 (17.9)            | 87 (15.0)                      |
| 1                                                 | 285 (41.2)                           | 298 (47.7)            | 320 (55.1)                     |
| 2                                                 | 134 (19.4)                           | 154 (24.6)            | 135 (23.2)                     |
| 3                                                 | 47 (6.8)                             | 48 (7.7)              | 32 (5.5)                       |
| 4                                                 | 9 (1.3)                              | 11 (1.8)              | 7 (1.2)                        |
| 5                                                 | 2 (0.3)                              | 1 (0.2)               | 0                              |
| 6                                                 | 0                                    | 1 (0.2)               | 0                              |
| Missing data:                                     | ANCmissing: 7                        | DELM: 74              | ONEMm: 118                     |

**Supplementary TABLE 5:**

Association between women naming  $\geq 3$  newborn danger signs and potential determinants of knowledge, at interviews at 1st ANC

| Sociodemographic and Obstetric characteristics | Crude analysis                 | Adjusted analysis              |
|------------------------------------------------|--------------------------------|--------------------------------|
|                                                | OR (95% CI); p-value           | OR (95% CI); p-value           |
| <b>Enrolment Clinic</b>                        |                                |                                |
| Vunapope (REF)                                 | REF                            | REF                            |
| Nonga                                          | 1.52 (0.63-3.67); 0.354        | 2.46 (0.97-6.26); 0.059        |
| Keravat                                        | 1.18 (0.52-2.7); 0.691         | 1.32 (0.55-3.2); 0.535         |
| Napapar                                        | 1.31 (0.61-2.81); 0.487        | 2.09 (0.91-4.84); 0.084        |
| Paparatava                                     | 0.78 (0.33-1.86); 0.575        | 1.29 (0.51-3.26); 0.593        |
| <b>Clinic administration</b>                   |                                |                                |
| Government (REF)                               | REF                            |                                |
| Church Health Facility                         | 0.78 (0.44-1.38); 0.398        |                                |
| <b>Age, years</b>                              |                                |                                |
| 16-24 (REF)                                    | REF                            | REF                            |
| 25-34                                          | 1.28 (0.7-2.34); 0.417         | 1.24 (0.61-2.5); 0.557         |
| 35 years or older                              | 1.82 (0.81-4.1); 0.145         | 1.63 (0.64-4.18); 0.309        |
| <b>Highest level of education completed</b>    |                                |                                |
| Primary school (Grade 8 or less)               | REF                            | REF                            |
| High school (Grade 9, 10)                      | 1.13 (0.57-2.26); 0.721        | 0.68 (0.32-1.45); 0.321        |
| Secondary (Grade 11,12)                        | 2.23 (0.9-5.51); 0.084         | 1.97 (0.72-5.4); 0.19          |
| Vocational or Tertiary                         | 1.39 (0.7-2.79); 0.349         | 0.85 (0.4-1.8); 0.666          |
| <b>Maternal employment status</b>              |                                |                                |
| Not employed                                   | REF                            |                                |
| Employed                                       | 1.15 (0.60-2.20); 0.666        |                                |
| <b>Province of Birth</b>                       |                                |                                |
| East New Britain                               | REF                            | REF                            |
| Other Province                                 | <b>2.37 (1.31-4.31); 0.004</b> | 1.78 (0.91-3.5); 0.092         |
| <b>Religion</b>                                |                                |                                |
| Catholic                                       | REF                            |                                |
| United                                         | 1.02 (0.55-1.89); 0.96         |                                |
| Other                                          | 1.79 (0.83-3.88); 0.14         |                                |
| <b>Household monthly expenditure in Kina</b>   |                                |                                |
| Poorest quintile (REF)                         | REF                            | REF                            |
| 50-150                                         | 1.14 (0.44-2.97); 0.785        | 1.08 (0.41-2.9); 0.871         |
| 150-300                                        | 1.83 (0.75-4.49); 0.186        | 1.79 (0.7-4.56); 0.225         |
| >300                                           | <b>4.15 (1.8-9.56); 0.001</b>  | <b>3.86 (1.53-9.72); 0.004</b> |
| <b>Time to clinic in minutes</b>               |                                |                                |
| 25mins or less (REF)                           | REF                            |                                |
| More than 25mins                               | 1.5 (0.84-2.67); 0.173         |                                |
| <b>Partner's highest level of education</b>    |                                |                                |
| Primary school (Grade 8 or less)               | REF                            |                                |
| High school (Grade 9, 10)                      | 1.37 (0.67-2.78); 0.388        |                                |
| Secondary (Grade 11,12)                        | 1.16 (0.48-2.81); 0.742        |                                |
| Vocational or Tertiary                         | 0.79 (0.38-1.63); 0.527        |                                |
| <b>Partner's employment status</b>             |                                |                                |
| Not employed/house duties                      | REF                            | REF                            |
| Employed                                       | 1.82 (1-3.3); 0.05             | 1.28 (0.66-2.46); 0.464        |
| <b>Partner present at ANC</b>                  |                                |                                |
| No not present                                 | REF                            | REF                            |
| Yes at ANC                                     | 1.7 (0.91-3.16); 0.097         | 1.63 (0.85-3.13); 0.145        |
| <b>Gravidity</b>                               |                                |                                |
| Primigravida                                   | REF                            |                                |
| Multigravida                                   | 1.46 (0.74-2.88); 0.275        | 1.15 (0.52-2.57); 0.729        |

NOTE: Marital status (Married or cohabiting/ Single/separated/widowed) was omitted because of collinearity.

**Supplementary TABLE 6:**

Association between women naming  $\geq 3$  newborn danger signs and potential determinants of knowledge, at interviews one month post-partum

| Sociodemographic and Obstetric characteristics | Crude analysis                 | Adjusted analysis               |
|------------------------------------------------|--------------------------------|---------------------------------|
|                                                | OR (95% CI); p-value           | OR (95% CI); p-value            |
| <b>Enrolment Clinic</b>                        |                                |                                 |
| Vunapope (REF)                                 | REF                            | REF                             |
| Nonga                                          | 0.62 (0.2-1.92); 0.404         | 0.71 (0.21-2.36); 0.572         |
| Keravat                                        | 0.87 (0.36-2.12); 0.76         | 0.73 (0.26-2.03); 0.545         |
| Napapar                                        | 0.44 (0.17-1.15); 0.094        | 0.48 (0.17-1.38); 0.175         |
| Paparatava                                     | 0.38 (0.14-1.06); 0.066        | 0.52 (0.17-1.58); 0.246         |
| <b>Clinic administration</b>                   |                                |                                 |
| Government (REF)                               | REF                            |                                 |
| Church Health Facility                         | 0.82 (0.41-1.66); 0.586        |                                 |
| <b>Age, years</b>                              |                                |                                 |
| 16-24 (REF)                                    | REF                            | REF                             |
| 25-34                                          | <b>2.43 (1.07-5.53); 0.034</b> | 2.72 (0.95-7.73); 0.061         |
| 35 years or older                              | <b>3.24 (1.13-9.32); 0.029</b> | <b>3.64 (1.01-13.06); 0.048</b> |
| <b>Highest level of education completed</b>    |                                |                                 |
| Primary school (Grade 8 or less)               | REF                            | REF                             |
| High school (Grade 9, 10)                      | <b>3.75 (1.55-9.07); 0.003</b> | <b>3.13 (1.2-8.2); 0.02</b>     |
| Secondary (Grade 11,12)                        | 2.61 (0.66-10.25); 0.171       | 3.45 (0.8-14.94); 0.098         |
| Vocational or Tertiary                         | <b>4.01 (1.62-9.95); 0.003</b> | <b>3.09 (1.16-8.22); 0.024</b>  |
| <b>Maternal employment status</b>              |                                |                                 |
| Not employed                                   | REF                            |                                 |
| Employed                                       | 1.63 (0.79-3.38); 0.188        |                                 |
| <b>Province of Birth</b>                       |                                |                                 |
| East New Britain                               | REF                            | REF                             |
| Other Province                                 | <b>3.38 (1.68-6.79); 0.001</b> | <b>2.97 (1.35-6.52); 0.007</b>  |
| <b>Religion</b>                                |                                |                                 |
| Catholic                                       | REF                            |                                 |
| United                                         | 0.73 (0.33-1.58); 0.423        |                                 |
| Other                                          | 1.4 (0.54-3.62); 0.491         |                                 |
| <b>Household monthly expenditure in Kina</b>   |                                |                                 |
| Poorest quintile (REF)                         | REF                            | REF                             |
| 50-150                                         | 0.66 (0.22-1.95); 0.451        | 0.4 (0.12-1.35); 0.14           |
| 150-300                                        | 1.32 (0.52-3.4); 0.559         | 0.99 (0.36-2.76); 0.985         |
| >300                                           | 2.19 (0.88-5.41); 0.09         | 1 (0.35-2.84); 0.998            |
| <b>Time to clinic in minutes</b>               |                                |                                 |
| 25mins or less(REF)                            | REF                            |                                 |
| More than 25mins                               | 0.89 (0.43-1.85); 0.758        |                                 |
| <b>Partner's highest level of education</b>    |                                |                                 |
| Primary school (Grade 8 or less)               | REF                            |                                 |
| High school (Grade 9, 10)                      | 0.75 (0.27-2.13); 0.59         |                                 |
| Secondary (Grade 11,12)                        | 0.71 (0.19-2.67); 0.611        |                                 |
| Vocational or Tertiary                         | 1.72 (0.77-3.85); 0.187        |                                 |
| <b>Partner's employment status</b>             |                                |                                 |
| Not employed/house duties                      | REF                            | REF                             |
| Employed                                       | 1.25 (0.63-2.5); 0.528         | 0.82 (0.38-1.76); 0.604         |
| <b>Partner present at ANC</b>                  |                                |                                 |
| No not present                                 | REF                            | 1.76 (0.8-3.92); 0.162          |
| Yes at ANC                                     | 1.7 (0.82-3.54); 0.153         |                                 |
| <b>Gravidity</b>                               |                                |                                 |
| Primigravida                                   | REF                            | REF                             |
| Multigravida                                   | 1.45 (0.62-3.36); 0.387        | 0.81 (0.27-2.44); 0.708         |

NOTE: Marital status (Married or cohabiting/ Single/separated/widowed) was omitted because of collinearity.
